# Supplementary material for: Ultrasound-activated decafluoropentane-cored and chitosan-shelled nanodroplets for oxygen delivery to hypoxic cutaneous tissues
Source: Royal Society of Chemistry journal article supplement (doi:10.1039/c4ra03524k), 2014-01-01
Supplement: c4ra03524k1.xlsx [file c4ra03524k1.xlsx]

## Sheet: Foglio1
	1				2				3
	Time	Oxygen OLND	Oxygen OLNB	Oxygen OSS	Time	Oxygen OLND	Oxygen OLNB	Oxygen OSS	Time	Oxygen OLND	Oxygen OLNB	Oxygen OSS
	min	mg/l	mg/l	mg/l	min	mg/l	mg/l	mg/l	min	mg/l	mg/l	mg/l
	422	16.19	--	--	1	14.22	--		422	16	--
	421	16.18		--	2	14.65	--		421	16	--
	420	16.18	--	--	3	14.77	--		420	16	--
	419	16.18	--	--	4	15.89	--		419	16.01	--
	418	16.17	--	--	5	16.6	--		418	16.01	--
	417	16.17	--	--	6	16.64	--		417	16	--
	416	16.18	--	--	7	16.4	--		416	16	--
	415	16.17	--	--	8	16.43	--		415	15.98	--
	414	16.17	--	--	9	16.63	--		414	15.98	--
	413	16.17	--	--	10	16.62	--		413	15.98	--
	412	16.16	--	--	11	16.6	--		412	15.98	--
	411	16.17	--	--	12	16.61	--		411	15.96	--
	410	16.16	--	--	13	16.6	--		410	15.96	--
	409	16.17	--	--	14	16.59	--		409	15.96	--
	408	16.16	--	--	15	16.58	--		408	15.96	--
	407	16.17	--	--	16	16.56	--		407	15.95	--
	406	16.17	--	--	17	16.53	--		406	15.95	--
	405	16.17	--	--	18	16.53	--		405	15.95	--
	404	16.16	--	--	19	16.5	--		404	15.94	--
	403	16.16	--	--	20	16.48	--		403	15.94	--
	402	16.17	--	--	21	16.47	--		402	15.94	--
	401	16.16	--	--	22	16.45	--		401	15.93	--
	400	16.16	--	--	23	16.43	--		400	15.92	--
	399	16.16	--	--	24	16.42	--		399	15.92	--
	398	16.16	--	--	25	16.4	--		398	15.92	--
	397	16.15	--	--	26	16.37	--		397	15.92	--
	396	16.16	--	--	27	16.36	--		396	15.91	--
	395	16.16	--	--	28	16.36	--		395	15.91	--
	394	16.15	--	--	29	16.34	--		394	15.91	--
	393	16.16	--	--	30	16.33	--		393	15.91	--
	392	16.17	--	--	31	16.33	--		392	15.92	--
	391	16.16	--	--	32	16.32	--		391	15.92	--
	390	16.16	--	--	33	16.32	--		390	15.92	--
	389	16.16	--	--	34	16.3	--		389	15.91	--
	388	16.15	--	--	35	16.29	--		388	15.91	--
	387	16.16	--	--	36	16.28	--		387	15.91	--
	386	16.17	--	--	37	16.26	--		386	15.91	--
	385	16.16	--	--	38	16.25	--		385	15.9	--
	384	16.16	--	--	39	16.24	--		384	15.9	--
	383	16.17	--	--	40	16.23	--		383	15.9	--
	382	16.18	--	--	41	16.22	--		382	15.9	--
	381	16.15	--	--	42	16.22	--		381	15.9	--
	380	16.16	--	--	43	16.2	--		380	15.91	--
	379	16.15	--	--	44	16.19	--		379	15.91	--
	378	16.15	--	--	45	16.19	--		378	15.91	--
	377	16.17	--	--	46	16.18	--		377	15.91	--
	376	16.15	--	--	47	16.32	--		376	15.92	--
	375	16.16	--	--	48	16.32	--		375	15.92	--
	374	16.16	--	--	49	16.3	--		374	15.92	--
	373	16.14	--	--	50	16.29	--		373	15.92	--
	372	16.18	--	--	51	16.28	--		372	15.93	--
	371	16.15	--	--	52	16.26	--		371	15.93	--
	370	16.16	--	--	53	16.25	--		370	15.93	--
	369	16.17	--	--	54	16.24	--		369	15.93	--
	368	16.17	--	--	55	16.23	--		368	15.92	--
	367	16.17	--	--	56	16.22	--		367	15.92
	366	16.16	10.43	--	57	16.22	10.9183		366	15.92	11.2708
	365	16.17	10.46	--	58	16.2	10.9233		365	15.92	11.2766
	364	16.16	10.48	--	59	16.19	10.9283		364	15.92	11.2824
	363	16.17	10.5	--	60	16.19	10.9333		363	15.91	11.2882
	362	16.16	10.5	--	61	16.18	10.9383		362	15.91	11.294
	361	16.18	10.5	--	62	16.19	10.9433		361	15.91	11.2998
	360	16.17	10.49	--	63	16.19	10.9483		360	15.91	11.3056
	359	16.16	10.49	--	64	16.19	10.9533		359	15.9	11.3115
	358	16.16	10.5	--	65	16.19	10.9583		358	15.9	11.3173
	357	16.17	10.51	--	66	16.18	10.9633		357	15.9	11.3231
	356	16.16	10.53	--	67	16.18	10.9683		356	15.9	11.3289
	355	16.16	10.55	--	68	16.18	10.9733		355	15.89	11.3347
	354	16.17	10.58	--	69	16.17	10.9783		354	15.89	11.3405
	353	16.18	10.6	--	70	16.17	10.9833		353	15.89	11.3463
	352	16.18	10.61	--	71	16.17	10.9883		352	15.89	11.3521
	351	16.18	10.62	--	72	16.17	10.9933		351	15.89	11.3579
	350	16.17	10.62	--	73	16.16	10.9983		350	15.89	11.3637
	349	16.18	10.61	--	74	16.16	11.0033		349	15.9	11.3695
	348	16.19	10.61	--	75	16.16	11.0083		348	15.9	11.3754
	347	16.18	10.61	--	76	16.15	11.0133		347	15.9	11.3812
	346	16.18	10.61	--	77	16.15	11.0183		346	15.9	11.387
	345	16.17	10.6	--	78	16.15	11.0233		345	15.91	11.3928
	344	16.17	10.61	--	79	16.14	11.0283		344	15.91	11.3986
	343	16.18	10.6	--	80	16.14	11.0333		343	15.91	11.4044
	342	16.18	10.59	--	81	16.14	11.0383		342	15.9	11.4102
	341	16.18	10.58	--	82	16.13	11.0433		341	15.9	11.416
	340	16.18	10.58	--	83	16.13	11.0483		340	15.9	11.4218
	339	16.19	10.6	--	84	16.13	11.0533		339	15.9	11.4276
	338	16.19	10.62	--	85	16.13	11.0583		338	15.89	11.4335
	337	16.18	10.65	--	86	16.12	11.0633		337	15.89	11.4393
	336	16.18	10.68	--	87	16.12	11.0683		336	15.89	11.4451
	335	16.17	10.7	--	88	16.12	11.0733		335	15.88	11.4509
	334	16.18	10.73	--	89	16.11	11.0783		334	15.88	11.4567
	333	16.18	10.75	--	90	16.11	11.0833		333	15.88	11.4625
	332	16.17	10.75	--	91	16.11	11.0883		332	15.88	11.4683
	331	16.19	10.76	--	92	16.11	11.0933		331	15.87	11.4741
	330	16.18	10.77	8.51	93	16.1	11.0983	8.77667	330	15.87	11.4799	9.351
	329	16.19	10.79		94	16.1	11.1033		329	15.87	11.4857
	328	16.18	10.81		95	16.1	11.1083		328	15.87	11.4915
	327	16.2	10.83		96	16.1	11.1133		327	15.86	11.4974
	326	16.18	10.85		97	16.11	11.1183		326	15.86	11.5032
	325	16.18	10.88	8.64	98	16.11	11.1233	8.89667	325	15.86	11.509	9.417
	324	16.18	10.93		99	16.11	11.1283		324	15.85	11.5148
	323	16.18	10.97		100	16.12	11.1333		323	15.85	11.5206
	322	16.17	11.02		101	16.12	11.1383		322	15.85	11.5264
	321	16.17	11.06		102	16.12	11.1433		321	15.85	11.5322
	320	16.17	11.1	8.77	103	16.13	11.1483	9.01667	320	15.86	11.538	9.483
	319	16.16	11.13		104	16.13	11.1533		319	15.86	11.5438
	318	16.17	11.18		105	16.13	11.1583		318	15.86	11.5496
	317	16.16	11.19		106	16.13	11.1633		317	15.87	11.5555
	316	16.17	11.22		107	16.14	11.17		316	15.87	11.5613
	315	16.16	11.25	8.84	108	16.14	11.17	9.13667	315	15.87	11.5671	9.549
	314	16.16	11.27		109	16.14	11.18		314	15.87	11.5729
	313	16.15	11.29		110	16.15	11.19		313	15.88	11.5787
	312	16.16	11.3		111	16.15	11.2		312	15.88	11.5845
	311	16.16	11.32		112	16.15	11.21		311	15.88	11.5903
	310	16.16	11.35	8.9	113	16.15	11.22	9.25667	310	15.88	11.5961	9.615
	309	16.15	11.4		114	16.16	11.23		309	15.89	11.6019
	308	16.16	11.46		115	16.16	11.24		308	15.89	11.6077
	307	16.16	11.53		116	16.17	11.25		307	15.89	11.6135
	306	16.15	11.62		117	16.17	11.25		306	15.89	11.6194
	305	16.16	11.8	9.14	118	16.17	11.26	9.37667	305	15.89	11.63	9.681
	304	16.16	12		119	16.17	11.27		304	15.89	11.63
	303	16.15	12.01		120	16.17	11.27		303	15.88	11.64
	302	16.16	12.01		121	16.18	11.28		302	15.88	11.64
	301	16.15	12.02		122	16.18	11.28		301	15.88	11.65
	300	16.15	12.03	9.82	123	16.18	11.28	9.49667	300	15.88	11.64	9.747
	299	16.16	12.05		124	16.18	11.29		299	15.89	11.65
	298	16.15	12.06		125	16.18	11.3		298	15.89	11.684
	297	16.16	12.07		126	16.19	11.31		297	15.89	11.737
	296	16.16	12.09		127	16.19	11.31		296	15.91	11.79
	295	16.15	12.09	9.93	128	16.19	11.32	9.61667	295	15.91	11.843	9.813
	294	16.18	12.1		129	16.19	11.33		294	15.91	11.896
	293	16.18	12.11		130	16.2	11.33		293	15.93	11.949
	292	16.15	12.13		131	16.2	11.33		292	15.93	12.002
	291	16.17	12.15		132	16.2	11.34		291	15.94	12.055
	290	16.16	12.16	9.98	133	16.2	11.35	9.73667	290	15.94	12.08	9.879
	289	16.17	12.16		134	16.2	11.36		289	15.95	12.1
	288	16.17	12.16		135	16.21	11.36		288	15.95	12.1
	287	16.16	12.16		136	16.21	11.37		287	15.95	12.12
	286	16.17	12.17		137	16.22	11.38		286	15.95	12.11
	285	16.16	12.18	10.4	138	16.22	11.38	9.85667	285	15.98	12.1	9.945
	284	16.18	12.19		139	16.23	11.39		284	15.98	12.11
	283	16.17	12.21		140	16.23	11.4		283	15.98	12.12
	282	16.16	12.22		141	16.22	11.4		282	15.98	12.12
	281	16.18	12.25		142	16.22	11.41		281	15.96	12.12
	280	16.18	12.27	10.41	143	16.22	11.42	10	280	15.96	12.12	10
	279	16.18	12.29		144	16.22	11.42		279	15.95	12.13
	278	16.18	12.3		145	16.21	11.43		278	15.95	12.13
	277	16.17	12.33		146	16.21	11.43		277	15.94	12.14
	276	16.18	12.34		147	16.21	11.44		276	15.94	12.14
	275	16.18	12.38	10.49	148	16.2	11.44	10.05	275	15.94	12.15	10.1
	274	16.17	12.42		149	16.2	11.44		274	15.92	12.15
	273	16.19	12.44		150	16.2	11.45		273	15.92	12.2
	272	16.18	12.49		151	16.2	11.46		272	15.93	12.28
	271	16.18	12.54		152	16.2	11.47		271	15.93	12.3
	270	16.19	12.58	10.54	153	16.21	11.48	10.24	270	15.922	12.36	10.13
	269	16.2	12.6		154	16.22	11.48		269	15.9197	12.38
	268	16.2	12.6		155	16.23	11.48		268	15.9174	12.4
	267	16.19	12.6		156	16.23	11.49		267	15.9151	12.41
	266	16.2	12.61		157	16.23	11.49		266	15.9129	12.48
	265	16.19	12.6	10.72	158	16.2	11.5	10.43	265	15.9106	12.5	10.21
	264	16.21	12.62		159	16.19	11.51		264	15.9083	12.56
	263	16.2	12.63		160	16.18	11.52		263	15.906	12.59
	262	16.22	12.64		161	16.15	11.52		262	15.9037	12.61
	261	16.22	12.66		162	16.1	11.53		261	15.9014	12.64
	260	16.24	12.67	10.78	163	16.03	11.53	10.58	260	15.8991	12.66	10.27
	259	16.22	12.67		164	16	11.54		259	15.8969	12.67
	258	16.22	12.67		165	15.99	11.54		258	15.8946	12.68
	257	16.23	12.68		166	15.99	11.54		257	15.8923	12.68
	256	16.23	12.67		167	15.98	11.6		256	15.89	12.69
	255	16.23	12.68	10.87	168	15.97	11.64	10.74	255	15.8877	12.7	10.3
	254	16.23	12.68		169	15.97	11.66		254	15.8854	12.73
	253	16.25	12.68	--	170	15.97	11.67		253	15.8854	12.75
	252	16.24	12.68	--	171	15.96	11.68		252	15.8854	12.76
	251	16.25	12.69	--	172	15.95	11.69		251	15.88	12.7831
	250	16.26	12.68	10.9	173	15.95	11.7	10.81	250	15.88	12.7866	10.34
	249	16.25	12.68	--	174	15.94	11.71		249	15.87	12.79
	248	16.27	12.69	--	175	15.94	11.71		248	15.87	12.7934
	247	16.25	12.69	--	176	15.93	11.72		247	15.86	12.7969
	246	16.27	12.69	--	177	15.92	11.72		246	15.86	12.8003
	245	16.26	12.69	11	178	15.9	11.73	10.9	245	15.86	12.8037	10.42
	244	16.27	12.69	--	179	16	11.73		244	15.8633	12.8071
	243	16.27	12.69	--	180	16.04	11.73		243	15.8545	12.8106
	242	16.26	12.68	--	181	16.05	11.74		242	15.8456	12.814
	241	16.27	12.68	--	182	16.04	11.75		241	15.84	12.8174
	240	16.27	12.68	11.13	183	16.04	11.76	10.98	240	15.84	12.8209	10.45
	239	16.28	12.68	--	184	16.03	11.77		239	15.84	12.8243
	238	16.3	12.67	--	185	16.03	11.7753		238	15.83	12.8277
	237	16.28	12.67	--	186	16.03	11.7813		237	15.83	12.8311
	236	16.29	12.67	--	187	16.02	11.7873		236	15.83	12.8346
	235	16.29	12.66	11.23	188	16.02	11.7933	11.02	235	15.83	12.838	10.59
	234	16.29	12.66	--	189	16.02	11.7993		234	15.8279	12.8414
	233	16.3	12.65	--	190	16.01	11.8053		233	15.819	12.8449
	232	16.3	12.65	--	191	16.01	11.8113		232	15.8102	12.8483
	231	16.31	12.65	--	192	16	11.8173		231	15.8013	12.8517
	230	16.3	12.65	11.32	193	15.99	11.8233	11.1	230	15.7925	12.8551	10.66
	229	16.31	12.64	--	194	15.99	11.8293		229	15.7925	12.8586
	228	16.32	12.64	--	195	15.98	11.8353		228	15.7925	12.862
	227	16.33	12.63	--	196	15.97	11.8413		227	15.7925	12.8654
	226	16.33	12.64	--	197	15.97	11.8473		226	15.8	12.8689
	225	16.33	12.62	11.46	198	15.97	11.8533	11.18	225	15.8	12.8723	10.74
	224	16.33	12.61	--	199	15.96	11.8593		224	15.8	12.8757
	223	16.32	12.62	--	200	15.95	11.8653		223	15.8	12.8791
	222	16.33	12.61	--	201	15.95	11.8713		222	15.79	12.8826
	221	16.35	12.61	--	202	15.94	11.8773		221	15.79	12.886
	220	16.35	12.61	11.57	203	15.94	11.8833	11.21	220	15.79	12.8894	10.85
	219	16.35	12.61	--	204	15.93	11.8893		219	15.79	12.8929
	218	16.36	12.6	--	205	15.93	11.8953		218	15.79	12.8963
	217	16.36	12.59	--	206	15.93	11.9013		217	15.79	12.8997
	216	16.37	12.59	--	207	15.92	11.9073		216	15.79	12.9031
	215	16.36	12.58	11.72	208	15.92	11.9133	11.25	215	15.8	12.9066	11.02
	214	16.37	12.58	--	209	15.92	11.9193		214	15.8	12.91
	213	16.38	12.56	--	210	15.91	11.9253		213	15.8	12.9134
	212	16.39	12.55	--	211	15.89	11.9313		212	15.81	12.9169
	211	16.38	12.53	--	212	15.89	11.9373		211	15.81	12.9203
	210	16.39	12.53	11.79	213	15.89	11.94	11.28	210	15.82	12.9237	11.2
	209	16.39	12.53	--	214	15.88	11.95		209	15.82	12.9271
	208	16.39	12.52	--	215	15.87	11.96		208	15.84	12.9306
	207	16.4	12.51	--	216	15.87	11.96		207	15.84	12.934
	206	16.42	12.51	--	217	15.86	11.97		206	15.84	12.9374
	205	16.4	12.51	11.94	218	15.86	11.97	11.3	205	15.85	12.9409	11.51
	204	16.42	12.5	--	219	15.84	11.98		204	15.85	12.9443
	203	16.41	12.49	--	220	15.85	11.98		203	15.86	12.9477
	202	16.42	12.49	--	221	15.84	11.99		202	15.86	12.9511
	201	16.43	12.48	--	222	15.84	11.99		201	15.87	12.9546
	200	16.43	12.46	12.06	223	15.83	11.99	11.34	200	15.87	12.958	11.69
	199	16.43	12.45	--	224	15.82	12		199	15.89	12.958
	198	16.44	12.45	--	225	15.82	12.02		198	15.89	12.958
	197	16.44	12.44	--	226	15.81	12.02		197	15.89	12.958
	196	16.43	12.47	--	227	15.81	12.03		196	15.89	12.96
	195	16.44	12.47	12.12	228	15.81	12.03	11.48	195	15.9	12.98	11.92
	194	16.44	12.51	--	229	15.8	12.04		194	15.9	13
	193	16.45	12.52	--	230	15.8	12.15		193	15.92	13.01
	192	16.46	12.56	--	231	15.8	12.24		192	15.92	13.03
	191	16.45	12.58	--	232	15.8	12.54		191	15.92	13.03
	190	16.45	12.61	12.29	233	15.79	12.82	11.55	190	15.94	13.46	12.11
	189	16.46	12.63	--	234	15.79	12.92		189	15.94	13.46
	188	16.45	12.63	--	235	15.79	13		188	15.95	13.65
	187	16.46	12.64	--	236	15.78	13.21		187	15.97	13.84
	186	16.48	12.63	--	237	15.78	13.31		186	15.97	13.98
	185	16.48	12.63	12.38	238	15.78	13.46	11.66	185	16	14.06	12.51
	184	16.48	12.64	--	239	15.78	13.69		184	16	14.15
	183	16.48	12.66	--	240	15.78	13.72		183	16.01	14.2
	182	16.49	12.67	--	241	15.77	13.82		182	16.03	14.25
	181	16.48	12.68	--	242	15.77	13.91		181	16.03	14.26
	180	16.5	12.7	12.43	243	15.77	13.99	11.75	180	16.05	14.37	12.65
	179	16.49	12.72	--	244	15.77	14.04		179	16.05	14.48
	178	16.49	12.75	--	245	15.77	14.21		178	16.07	14.59
	177	16.51	12.79	--	246	15.77	14.32		177	16.08	14.7
	176	16.49	12.81	--	247	15.76	14.48		176	16.1	14.81
	175	16.51	12.84	12.58	248	15.76	14.59	11.85	175	16.11	14.92	12.8
	174	16.5	12.87	--	249	15.76	14.71		174	16.12	15.03
	173	16.51	12.91	--	250	15.76	14.84		173	16.12	15.14
	172	16.51	12.95	--	251	15.76	14.9		172	16.13	15.25
	171	16.5	13	--	252	15.76	14.96		171	16.13	15.36
	170	16.52	13.07	12.75	253	15.76	15.05	11.97	170	16.15	15.47	13.02
	169	16.52	13.12	--	254	15.76	15.3		169	16.15	15.58
	168	16.5	13.18	--	255	15.76	15.39		168	16.17	15.69
	167	16.52	13.27	--	256	15.76	15.45	12	167	16.18	15.8
	166	16.51	13.38	--	257	15.75	15.83		166	16.19	15.91
	165	16.52	13.59	12.87	258	15.75	15.91	12.04	165	16.21	16.02	13.41
	164	16.52	13.83	--	259	15.75	16.03		164	16.21	16.13
	163	16.51	14.11	--	260	15.76	16.23		163	16.24	16.24
	162	16.52	14.36	--	261	15.76	16.54		162	16.28	16.35
	161	16.52	14.5	--	262	15.75	16.98		161	16.3	16.46
	160	16.54	14.69	13	263	15.75	17.03	12.42	160	16.3	16.57	13.65
	159	16.53	14.76	--	264	15.75	17.14		159	16.3	16.68
	158	16.54	14.95	--	265	15.74	17.25		158	16.28	16.79
	157	16.52	15.27	--	266	15.74	17.53		157	16.28	16.9
	156	16.53	15.43	--	267	15.74	17.63		156	16.27	17.01
	155	16.54	15.56	13.16	268	15.74	17.82	12.52	155	16.26	17.12	13.89
	154	16.54	15.69	--	269	15.74	17.95		154	16.26	17.23
	153	16.53	15.99	--	270	15.73	18.02		153	16.25	17.34
	152	16.54	16.36	--	271	15.73	18.1		152	16.25	17.45
	151	16.54	16.87	--	272	15.73	18.22		151	16.25	17.56
	150	16.54	17.25	13.48	273	15.73	18.49	12.98	150	16.23	17.67	14.11
	149	16.53	17.63	--	274	15.72	18.58		149	16.23	17.78
	148	16.55	17.97	--	275	15.72	18.62		148	16.22	17.89
	147	16.55	18.03	--	276	15.72	18.74		147	16.22	18
	146	16.55	18.22	--	277	15.71	18.82		146	16.21	18.11
	145	16.55	18.37	13.58	278	15.71	18.9	13.1	145	16.21	18.22	14.43
	144	16.55	18.56	--	279	15.71	19.02		144	16.21	18.33
	143	16.55	18.78	--	280	15.7	19.24		143	16.2	18.44
	142	16.55	18.96	--	281	15.7	19.35		142	16.2	18.55
	141	16.54	19.08	--	282	15.7	19.46		141	16.18	18.66
	140	16.55	19.37	13.76	283	15.69	19.65	13.24	140	16.18	18.77	14.68
	139	16.55	19.46	--	284	15.7	19.71		139	16.17	18.88
	138	16.56	19.64	--	285	15.7	19.74		138	16.17	18.99
	137	16.56	19.89	--	286	15.7	19.76		137	16.17	19.1
	136	16.56	19.95	--	287	15.69	19.8		136	16.17	19.21
	135	16.55	20.1	13.98	288	15.69	19.83	13.83	135	16.17	19.23	14.96
	134	16.56	20.13	--	289	15.68	19.86		134	16.17	19.34
	133	16.55	20.15	--	290	15.69	19.9		133	16.16	19.4
	132	16.57	20.17	--	291	15.67	19.93		132	16.16	19.44
	131	16.56	20.23	--	292	15.67	19.95		131	16.16	19.46
	130	16.56	20.27	14.17	293	15.67	19.96	14.01	130	16.16	19.4683	15.21
	129	16.55	20.29	--	294	15.67	19.97		129	16.16	19.4733
	128	16.56	20.35	--	295	15.66	19.99		128	16.17	19.4783
	127	16.55	20.41	--	296	15.66	20		127	16.17	19.4833
	126	16.56	20.47	--	297	15.66	20.05		126	16.17	19.4883
	125	16.57	20.5	14.38	298	15.65	20.1	14.23	125	16.16	19.4933	15.34
	124	16.56	20.52	--	299	15.65	20.15		124	16.15	19.4983
	123	16.57	20.58	--	300	15.65	20.17		123	16.15	19.5033
	122	16.56	20.61	--	301	15.65	20.18		122	16.144	19.5083
	121	16.54	20.66	--	302	15.64	20.19		121	16.138	19.5133
	120	16.55	20.79	14.65	303	15.64	20.21	14.44	120	16.132	19.5183	15.65
	119	16.55	20.8	--	304	15.63	20.22		119	16.126	19.5233
	118	16.55	20.82	--	305	15.63	20.22		118	16.12	19.5283
	117	16.55	20.8	--	306	15.62	20.23		117	16.12	19.5333
	116	16.55	20.8	--	307	15.62	20.23		116	16.11	19.5383
	115	16.54	20.8	14.83	308	15.61	20.23	14.84	115	16.1	19.5433	15.72
	114	16.54	20.79	--	309	15.6	20.22		114	16.1	19.55
	113	16.56	20.78	--	310	15.59	20.22		113	16.09	19.55
	112	16.52	20.76	--	311	15.57	20.22		112	16.084	19.56
	111	16.54	20.75	--	312	15.58	20.21		111	16.078	19.57
	110	16.52	20.72	14.96	313	15.57	20.21	15.19	110	16.072	19.58	15.78
	109	16.52	20.7	--	314	15.57	20.21		109	16.066	19.58
	108	16.52	20.69	--	315	15.55	20.2		108	16.06	19.6
	107	16.52	20.66	--	316	15.55	20.2		107	16.06	19.6
	106	16.51	20.64	--	317	15.54	20.19		106	16.06	19.6
	105	16.5	20.64	15.13	318	15.54	20.19	15.41	105	16.06	19.64	15.83
	104	16.51	20.61	--	319	15.53	20.18		104	16.054	19.64
	103	16.5	20.58	--	320	15.52	20.18		103	16.048	19.64
	102	16.5	20.54	--	321	15.52	20.17		102	16.042	19.64
	101	16.5	20.52	--	322	15.51	20.17		101	16.042	19.66
	100	16.49	20.49	15.3	323	15.5	20.16	15.63	100	16.036	19.68	15.93
	99	16.5	20.43	--	324	15.5	20.16		99	16.06	19.7
	98	16.47	20.39	--	325	15.5	20.16		98	16.06	19.72
	97	16.47	20.37	--	326	15.49	20.15		97	16.06	19.74
	96	16.48	20.33	--	327	15.49	20.15		96	16.06	19.76
	95	16.48	20.31	15.42	328	15.48	20.14	15.89	95	16.05	19.78	16.02
	94	16.46	20.29	--	329	15.48	20.14		94	16.05	19.8
	93	16.46	20.25	--	330	15.48	20.13		93	16.05	19.82
	92	16.46	20.22	--	331	15.47	20.13		92	16.04	19.84
	91	16.45	20.21	--	332	15.47	20.12		91	16.04	19.86
	90	16.44	20.18	15.65	333	15.47	20.12	16.2	90	16.04	19.88	16.34
	89	16.43	20.15	--	334	15.47	20.11		89	16.03	19.9	--
	88	16.44	20.15	--	335	15.46	20.11		88	16.03	19.92	--
	87	16.43	20.12	--	336	15.46	20.1		87	16.03	19.94	--
	86	16.42	20.12	--	337	15.46	20.09		86	16.024	19.96	--
	85	16.43	20.1	15.9	338	15.46	20.08	16.41	85	16.024	19.98	16.69
	84	16.42	20.09	--	339	15.46	20.08		84	16.024	20
	83	16.42	20.08	--	340	15.45	20.07		83	16.018	20.02
	82	16.42	20.08	--	341	15.45	20.08		82	16.012	20.04
	81	16.4	20.07	--	342	15.45	20.09		81	16.006	20.06
	80	16.4	20.08	16.13	343	15.45	20.09	16.6	80	16	20.08	17.02
	79	16.4	20.09	--	344	15.45	20.08		79	16.012	20.1	--
	78	16.39	20.09	--	345	15.45	20.1		78	16.006	20.12	--
	77	16.38	20.08	--	346	15.44	20.11		77	16.012	20.14	--
	76	16.37	20.1	--	347	15.44	20.09		76	16.015	20.16	--
	75	16.37	20.11	16.28	348	15.44	20.11	16.75	75	16.018	20.18	17.32
	74	16.37	20.09	--	349	15.44	20.11		74	16.01	20.2
	73	16.35	20.11	--	350	15.44	20.11		73	16.01	20.22
	72	16.35	20.11	--	351	15.45	20.1		72	16.01	20.24
	71	16.33	20.11	--	352	15.45	20.1		71	16.0092	20.26
	70	16.32	20.13	16.48	353	15.45	20.09	16.94	70	16.0083	20.28	17.43
	69	16.34	20.14	--	354	15.45	20.07		69	16.0073	20.3
	68	16.32	20.14	--	355	15.44	20.05		68	16.0064	20.32
	67	16.3	20.15	--	356	15.44	20.04		67	16.0054	20.34
	66	16.31	20.18	--	357	15.44	20		66	16.0045	20.36
	65	16.29	20.2	16.7	358	15.44	19.97	17.17	65	16.0035	20.38	17.56
	64	16.29	20.22	--	359	15.44	19.97		64	16.0026	20.4
	63	16.28	20.24	--	360	15.43	19.96		63	16.0017	20.44
	62	16.28	20.26	--	361	15.43	19.95		62	16.0007	20.46
	61	16.26	20.29	--	362	15.43	19.9		61	15.99	20.48
	60	16.25	20.31	16.97	363	15.42	19.85	17.57	60	15.99	20.5	17.86
	59	16.25	20.32	--	364	15.42	19.81		59	15.98	20.52
	58	16.23	20.35	--	365	15.42	19.78		58	15.96	20.52
	57	16.23	20.38	--	366	15.42	19.72		57	15.96	20.53
	56	16.22	20.41	--	367	15.42	19.65		56	15.96	20.78
	55	16.21	20.43	17.32	368	15.42	19.63	17.79	55	15.98	20.78	17.9
	54	16.2	20.48	--	369	15.43	19.58		54	15.98	20.8
	53	16.19	20.48	--	370	15.43	19.49		53	15.98	20.8
	52	16.19	20.51	--	371	15.43	19.43		52	15.98	20.8
	51	16.19	20.54	--	372	15.43	19.41	17.99	51	15.97	20.83	18
	50	16.18	20.56	17.6	373	15.44	19.4		50	15.97	20.83
	49	16.18	20.6	--	374	15.44	19.36		49	15.97	20.83
	48	16.17	20.66	--	375	15.44	19.34		48	15.98	20.85
	47	16.18	20.69	--	376	15.43	19.33		47	15.98	20.85
	46	16.16	20.72	--	377	15.43	19.32		46	15.98	20.86
	45	16.15	20.75	17.75	378	15.43	19.31	18.03	45	15.97	20.87	18.19
	44	16.16	20.77	--	379	15.42	19.24		44	15.97	20.88
	43	16.16	20.81	--	380	15.42	19.23		43	15.95	20.87
	42	16.13	20.87	--	381	15.42	19.2		42	15.95	20.8467
	41	16.14	20.92	--	382	15.41	19.21		41	15.94	20.6667
	40	16.13	20.9	17.91	383	15.41	19.22	18.07	40	15.94	20.4867	18.06
	39	16.11	20.99	--	384	15.41	19.3		39	15.93	20.3067
	38	16.09	20.91	--	385	15.41	19.3		38	15.93	20.09
	37	16.08	20.86	--	386	15.42	19.35		37	15.92	20.02
	36	16.07	20.81	--	387	15.42	19.32		36	15.92	19.73	--
	35	16.05	20.79	18.15	388	15.42	19.13	18.1	35	15.91	19.23	17.98
	34	16.03	20.74	--	389	15.41	19		34	15.9	19.03	--
	33	16.01	20.69	--	390	15.41	18.96		33	15.9	18.98	--
	32	15.99	20.65	--	391	15.41	18.56		32	15.89	18.46	--
	31	15.98	20.56	--	392	15.41	18.21		31	15.89	18.35	--
	30	15.95	20.25	18.24	393	15.4	17.59	18.09	30	15.88	18.02	17.65
	29	15.93	20.14	--	394	15.4	17.54		29	15.88	17.98
	28	15.92	20.05	--	395	15.4	17.35		28	15.87	17.74
	27	15.88	20.01	--	396	15.39	17.22		27	15.87	17.62
	26	15.89	19.99	--	397	15.39	17.18		26	15.86	17.54
	25	15.88	19.87	17.96	398	15.39	17.07	18.08	25	15.86	17.21	17.33
	24	15.87	19.72	--	399	15.39	17.05		24	15.86	17.16	--
	23	15.87	19.67	--	400	15.4	17.03		23	15.84	17.11	--
	22	15.88	19.51	--	401	15.4	17		22	15.83	17.16
	21	15.87	19.46	--	402	15.4	16.76		21	15.8	17.01
	20	15.87	19.35	16.19	403	15.4	16.32	17.54	20	15.75	16.89	17.04
	19	15.86	19.25	--	404	15.41	16.17		19	15.71	16.96
	18	15.86	19.2	--	405	15.41	16.15		18	15.68	16.52
	17	15.83	19.14	--	406	15.41	16.1		17	15.62	16.51
	16	15.81	18.89	--	407	15.41	15.98		16	15.6	16.12
	15	15.79	18.54	15.8	408	15.41	15.5	16.76	15	15.59	15.98	16.98
	14	15.76	18.36	--	409	15.4	15.22		14	15.55	15.41
	13	15.74	18.14	--	410	15.4	15.04		13	15.46	15.26
	12	15.7	17.9	--	411	15.4	14.98		12	15.38	15.16
	11	15.64	17.68	--	412	15.4	14.78		11	15.33	15.12
	10	15.6	17.43	14.69	413	15.41	14.55	15.98	10	15.25	15.09	16.28
	9	15.55	17.25	--	414	15.41	14.01		9	15.19	14.88
	8	15.49	17	--	415	15.41	13.57		8	15.16	14.56
	7	15.41	16.86	--	416	15.42	13.21		7	15.05	13.41
	6	15.25	16.45	--	417	15.42	12.7		6	14.98	12.56
	5	15.03	16.23	13.97	418	15.42	11.98	14.67	5	14.88	11.98	15.78
	4	14.62	15.89	--	419	15.41	11.54		4	14.45	11.46
	3	14.06	14.12	--	420	15.41	10.78		3	14.23	10.98
	2	11.48	14.75	--	421	15.41	10.55		2	13.91	10.32
	1	13.28	13.54	--	422	15.41	10.43		1	13.76	10.09
	0	13.28	9.1	12.81	423	15.41	10	14	0	12.89	10	15.56
											--
											--
											--
											--
											--
											--
											--
										--
										--
										--
										--
										--
										--
										--
										--
										--
										--
										--
										--
										--
										--
										--
										--
										--
										--
										--
										--
										--
										--
										--
										--
										--
										--
										--
										--
										--
										--
										--
										--
										--
										--
										--
										--
										--
										--
										--
										--
										--
										--

## Sheet: Foglio3
	1				2				3
	Time	Oxygen OLNB	Oxygen OLND	Oxygen OSS	Time	Oxygen OLNB	Oxygen OLND	Oxygen OSS	Time	Oxygen OLNB	Oxygen OLND	Oxygen OSS
	min	mg/l	mg/l	mg/l	min	mg/l	mg/l	mg/l	min	mg/l	mg/l	mg/l
	366	--	14.03		366				366
	365	--	--		365				365		--
	364	--	--		364				364	--	--
	363	--	--		363				363	--	--
	362	--	--		362				362	--	--
	361	--	14.08	8.64	361	--	13.78	8.53	361	--	14.98	9.01
	360	--	--		360				360	--	--
	359	--	--		359				359	--	--
	358	--	--		358				358	--	--
	357	--	--		357				357	--	--
	356	--	14.1	--	356	--	13.89	8.54	356	--	14.99	9.12
	355	--	--		355				355	--	--
	354	--	--		354				354	--	--
	353	--	--		353				353	--	--
	352	--	--		352				352	--	--
	351	--	14.13	8.84	351	--	13.88	8.54	351	9.77	14.98	9.19
	350	--	--	8.85	350	--	--		350	--	--
	349	--	--	8.87	349	--	--		349	--	--
	348	--	--	--	348	--	--		348	--	--
	347		--		347		--		347	--	--
	346	9.75	14.16	8.92	346	9.96	13.84	8.62	346	9.78	14.96	9.2
	345	--	--	--	345		--		345		--
	344		--		344	--	--		344	--	--
	343	--	--		343	--	--		343		--
	342	--	--		342	--	--		342		--
	341	9.85	14.18	9	341	9.97	13.78	8.82	341	9.8	14.94	9.26
	340	--	--	9.01	340		--		340		--
	339	--	--	9.02	339		--		339		--
	338	--	--	--	338		--		338	--	--
	337	--	--	9.04	337		--		337		--
	336	9.9	14.18	9.05	336	9.98	13.67	8.81	336	9.82	14.88	9.35
	335	--	--	9.06	335		--		335	--	--
	334	--	--	9.07	334		--		334		--
	333	--	--	--	333		--	--	333		--
	332	--	--	9.09	332		--		332	--	--
	331	9.94	14.19	9.11	331	10	13.64	8.98	331	9.84	14.89	9.46
	330	--	--	--	330		--	--	330		--	--
	329	--	--	9.14	329		--		329	--	--
	328	--	--	9.17	328		--		328		--
	327	--	--	9.19	327		--		327		--
	326	10	14.2	--	326	10.1	13.62	9.02	326	--	14.92	9.58
	325	--	--		325	--	--		325
	324	--	--		324	--	--		324
	323	--	--		323	--	--		323
	322	--	--	--	322		--	--	322		--	--
	321	10.05	14.22	9.31	321	10.12	13.61	9.01467	321	9.86	14.9	9.51
	320	--	--		320	--	--		320	--	--
	319	--	--		319	--	--		319		--	--
	318	--	--		318	--	--		318
	317	--	--		317	--	--		317
	316	10.09	14.23	9.37	316	10.14	13.61	9.02967	316	9.87	14.89	9.67
	315	--	--	--	315		--		315		--
	314	--	--		314	--	--		314	--	--
	313	--	--		313	--	--		313		--
	312	--	--		312	--	--		312		--
	311	10.14	14.24	9.39	311	10.16	13.6	9.03567	311	9.89	14.87	9.73
	310	--	--		310				310		--
	309	--	--		309				309		--
	308	--	--		308				308	--	--
	307	--	--		307				307		--	--
	306	10.19	14.23	9.44	306	10.17	13.57	9.05067	306	9.89	14.86	9.8
	305	--	--		305				305	--	--
	304	--	--		304				304		--
	303	--	--		303				303		--
	302	--	--		302				302	--	--	--
	301	10.22	14.24	9.5	301	10.18	13.56	9.06567	301	9.9	14.84	9.85
	300	--	--		300				300	--	--
	299	--	--		299				299	--	--
	298	--	--		298				298		--
	297	--	--		297				297		--
	296	10.27	14.22	9.55	296	10.2	13.55	9.07	296	9.92	14.81	9.87
	295	--	--		295				295	--	--
	294	--	--		294				294	--	--
	293	--	--		293				293	--	--
	292	--	--		292				292		--
	291	10.3	14.23	9.59	291	10.18	13.53	9.09	291	9.92	14.8	9.9
	290	--	--		290				290	--	--
	289	--	--		289				289	--	--
	288	--	--		288				288	--	--
	287	--	--		287				287	--	--
	286	10.34	14.22	9.69	286	10.1	13.52	9.1	286	9.93	14.78	9.91
	285	--	--		285				285	--	--
	284	--	--		284				284	--	--
	283	--	--		283				283	--	--
	282	--	--		282				282	--	--
	281	10.38	14.24	9.73	281	10.12	13.53	9.14	281	9.94	14.76	9.98
	280	--	--		280				280	--	--	--
	279	--	--		279				279	--	--
	278	--	--		278				278	--	--
	277	--	--		277				277	--	--
	276	10.42	14.23	9.8	276	10.13	13.5	9.2	276	9.95	14.77	9.98
	275	--	--		275				275	--	--
	274	--	--		274				274	--	--
	273	--	--		273				273	--	--
	272	--	--		272				272	--	--
	271	10.45	14.23	9.88	271	10.14	13.56	9.47	271	9.95	14.75	9.9
	270	--	--		270				270	--	--
	269	--	--		269				269	--	--	--
	268	--	--		268				268	--	--
	267	--	--		267				267	--	--
	266	10.49	14.23	9.98	266	10.15	13.59	9.58	266	9.97	14.74	9.98
	265	--	--		265				265	--	--
	264	--	--		264				264	--	--
	263	--	--		263				263	--	--
	262	--	--		262				262	--	--	--
	261	10.51	14.24	10.08	261	10.16	13.61	9.84	261	9.98	14.65	9.97
	260	--	--		260				260	--	--
	259	--	--		259				259	--	--
	258	--	--		258				258	--	--
	257	--	--		257				257	--	--
	256	10.54	14.24	10.16	256	10.17	13.6	9.96	256	9.99	14.67	9.98
	255	--	--		255				255	--	--
	254	--	--		254				254	--	--
	253	--	--		253				253	--	--	--
	252	--	--		252				252	--	--
	251	10.62	14.25	10.28	251	10.18	13.63	10.09	251	10.08	14.55	9.99
	250	--	--		250				250	--	--
	249	--	--		249				249	--	--
	248	--	--		248				248	--	--	--
	247	--	--		247				247	--	--
	246	10.65	14.25	10.38	246	10.19	13.69	10.22	246	10.09	14.58	10.01
	245	--	--	--	245	--	--	--	245	--	--	--
	244	--	--		244				244	--	--
	243	--	--		243				243	--	--
	242	--	--		242				242	--	--
	241	10.66	14.25	--	241	10.2	13.78	10.4	241	10.22	14.6	10.03
	240	--	--		240				240	--	--
	239	--	--		239				239	--	--
	238	--	--		238				238	--	--
	237	--	--	--	237	--	--	--	237	--	--	--
	236	10.68	14.28	10.58	236	10.22	13.97	10.58	236	10.52	14.62	10.05
	235	--	--	10.6	235	--	--	10.6	235	--	--
	234	--	--		234				234	--	--
	233	--	--		233				233	--	--
	232	--	--		232	--	--		232	--	--
	231	10.67	14.32	10.66	231	10.27	14.12	10.42	231	10.77	14.56	10.07
	230	--	--		230				230	--	--
	229	--	--		229				229	--	--
	228	--	--		228				228	--	--
	227	--	--		227				227	--	--
	226	10.66	14.35	10.78	226	10.36	14.24	10.75	226	10.98	14.65	10.09
	225	--	--		225				225	--	--	--
	224	--	--		224				224	--	--
	223	--	--		223				223	--	--
	222	--	--		222				222	--	--
	221	10.69	14.4	--	221	10.59	14.33	10.86	221	11.19	14.54	10.1
	220	--	--		220	--	--		220	--	--
	219	--	--		219	--	--		219	--	--	--
	218	--	--		218	--	--		218	--	--
	217	--	--		217	--	--		217	--	--
	216	10.78	14.41	10.98	216	10.61	14.36	10.88	216	11.3	14.41	10.45
	215	--	--		215	--	--		215	--	--
	214	--	--		214	--	--		214	--	--
	213	--	--		213	--	--		213	--	--
	212	--	--		212	--	--		212	--	--
	211	10.78	14.41	11.08	211	10.69	14.39	11.08	211	11.44	14.31	10.62
	210	--	--		210	--	--		210	--	--
	209	--	--		209	--	--		209	--	--
	208	--	--		208	--	--		208	--	--	--
	207	--	--		207	--	--		207	--	--
	206	10.81	14.39	11.18	206	10.78	14.48	10.78	206	11.64	14.38	10.73
	205	--	--		205	--	--		205	--	--
	204	--	--		204	--	--		204	--	--
	203	--	--		203	--	--		203	--	--	--
	202	--	--		202	--	--		202	--	--
	201	10.85	14.34	11.28	201	10.98	14.59	10.88	201	11.85	14.37	10.83
	200	--	--		200	--	--		200	--	--
	199	--	--		199	--	--		199	--	--
	198	--	--		198	--	--		198	--	--
	197	--	--		197	--	--		197	--	--
	196	10.96	14.35	--	196	11.16	14.57	11	196	12	14.32	10.94
	195	--	--		195				195	--	--
	194	--	--		194				194	--	--
	193	--	--		193				193	--	--
	192	--	--		192	--	--		192	--	--
	191	11.01	14.42	11.46	191	11.44	14.5	11.05	191	12.13	14.32	10.97
	190	--	--		190				190	--	--
	189	--	--		189				189	--	--
	188	--	--		188				188	--	--
	187	--	--	--	187	--	--	--	187	--	--	--
	186	11.05	14.53	11.58	186	11.76	14.45	11.07	186	12.41	14.43	10.99
	185	--	--		185	--	--		185	--	--
	184	--	--		184	--	--		184	--	--
	183	--	--		183	--	--		183	--	--
	182	--	--		182	--	--		182	--	--
	181	11.2	14.67	11.68	181	11.2	14.41	11.18	181	12.62	14.53	11.08
	180	--	--		180				180	--	--
	179	--	--		179				179	--	--
	178	--	--		178				178	--	--
	177	--	--		177	--	--		177	--	--
	176	11.31	14.84	11.76	176	12.02	14.42	11.26	176	12.85	14.44	11.42
	175	--	--		175				175	--	--
	174	--	--		174	--	--		174	--	--
	173	--	--		173	--	--		173	--	--	--
	172	--	--		172	--	--		172		--
	171	11.55	14.99	11.88	171	12.34	14.44	11.31	171	13.04	14.79	11.68
	170	--	--		170	--	--		170	--	--
	169	--	--		169	--	--		169	--	--
	168	--	--		168	--	--		168	--	--
	167	--	--	--	167	--	--	--	167	--	--	--
	166	11.69	15.23	11.98	166	12.67	14.46	11.48	166	13.27	14.8	11.78
	165	--	--		165	--	--		165		--
	164	11.78	--		164	13.01	--		164		--
	163	--	--		163	--	--		163		--
	162	--	--		162	--	--		162		--
	161	12.05	15.33	12.08	161	13.23	14.4	11.58	161	13.35	14.76	11.84
	160	--	--	--	160	--	--	--	160	--	--
	159	--	--		159	--	--		159	--	--
	158	12.25	--		158	13.58	--		158		--
	157	--	--		157	--	--		157	--	--
	156	12.65	15.5	12.16	156	13.68	14.56	11.64	156	13.43	14.72	11.85
	155	--	--		155				155	--	--
	154		--		154				154		--
	153	--	--		153				153	--	--
	152	--	--		152				152	--	--
	151	13.33	15.66	12.28	151	13.89	14.5	11.78	151	13.65	14.69	11.86
	150	--	--		150				150	--	--
	149		--		149				149		--
	148	--	--		148	--	--	--	148	--	--
	147	--	--	--	147	--	--		147	--	--
	146	13.83	15.78	12.36	146	14.18	14.4	11.84	146	13.86	14.63	12.02
	145	--	--		145				145	--	--
	144	--	--		144				144	--	--
	143	--	--		143				143	--	--
	142	--	--		142				142	--	--
	141	14.03	15.8	12.48	141	14.13	14.42	11.95	141	13.97	14.58	12.22
	140	--	--		140				140	--	--
	139	--	--	--	139	--	--	--	139	--	--
	138	--	--		138				138	--	--
	137	--	--		137				137	--	--
	136	14.11	15.84	12.58	136	14.18	14.46	11.94	136	13.99	14.52	12.42
	135	--	--		135	--	--		135	--	--
	134	--	--	--	134	--	--	--	134	--	--
	133	--	--		133	--	--		133	--	--
	132	--	--	12.64	132	--	--		132	--	--
	131	14.14	15.82	12.66	131	14.28	14.49	12.03	131	14.01	14.78	12.61
	130	--	--		130				130	--	--
	129	--	--		129				129	--	--
	128	--	--		128				128	--	--
	127	--	--	--	127	--	--	--	127	--	--	--
	126	14.16	15.79	12.78	126	14.26	14.53	12.18	126	14.02	14.93	12.78
	125	--	--		125				125	--
	124	--	--		124				124	--
	123	--	--		123				123	--
	122	--	--		122				122	--
	121	14.17	15.78	12.847	121	14.17	14.52	12.37	121	14	15.03	12.78
	120	--	--	--	120	--	--	--	120	--	--	--
	119	--	--		119				119
	118	--	--		118				118
	117	--	--		117				117
	116	14.17	15.76	12.912	116	14.18	14.52	12.54	116	13.98	15.16	12.98
	115	--	--	--	115	--			115
	114	--	--		114				114
	113	--	--		113				113
	112	--	--	--	112	--	--	--	112	--	--	--
	111	14.17	15.77	12.977	111	14.17	14.57	12.74	111	13.83	15.16	13.19
	110	--	--		110				110
	109	--	--		109				109
	108	--	--		108				108
	107	--	--		107				107
	106	14.16	15.8	--	106	14.16	14.61	--	106	13.87	15.18	13.4
	105	--	--	13.055	105	--	--	12.85	105	--	--
	104	--	--		104				104	--	--
	103	--	--		103				103	--	--
	102	--	--		102				102	--	--
	101	14.16	15.81	13.107	101	14.07	14.79	13	101	14	15.2	13.53
	100	--	--		100				100	--	--
	99	--	--		99				99	--	--
	98	--	--		98				98	--	--
	97	--	--		97				97	--	--
	96	14.14	15.84	--	96	14.1	14.94	13.08	96	14.07	15.21	13.68
	95	--	--	13.18	95	--	--		95	--	--
	94	--	--		94				94	--	--
	93	--	--		93				93	--	--
	92	--	--		92				92	--	--
	91	14.1	15.85	--	91	14.12	14.93	--	91	14.24	15.22	13.82
	90	--	--	13.22	90	--	--	13.1	90	--	--
	89	--	--	--	89	--	--		89
	88	--	--		88				88
	87	--	--		87				87
	86	14.06	15.81	--	86	14.25	14.9	13.1	86	14.32	15.21	13.94
	85	--	--	13.25	85	--	--		85	--	--
	84	--	--		84				84	--	--
	83	--	--		83				83	--	--
	82	--	--	--	82	--	--	--	82	--	--	--
	81	14.03	15.78	13.3	81	14.26	14.85	13.32	81	14.46	15.25	14.03
	80	--	--		80				80	--
	79	--	--		79				79	--
	78	--	--		78				78	--
	77	--	--	--	77	--	--	--	77	--	--	--
	76	13.97	15.72	13.39	76	14.28	14.8	13.49	76	14.45	15.32	14.51
	75	--	--	--	75	--	--	--	75	--	--	--
	74	--	--		74				74	--	--
	73	--	--		73				73
	72	--	--		72				72
	71	13.88	15.69	--	71	14.24	14.9	--	71	14.34	15.36	14.72
	70	--	--		70				70
	69	--	--		69				69
	68	--	--		68				68
	67	--	--		67				67
	66	13.78	15.63	13.59	66	14.14	14.63	13.79	66	14.16	15.42	14.8
	65	--	--	--	65	--	--	--	65	--	--	--
	64	--	--		64				64
	63	--	--		63				63
	62	--	--	--	62	--	--	--	62	--	--	--
	61	13.65	15.61	13.68	61	14.22	14.76	13.98	61	14.14	15.51	14.88
	60	--	--	--	60	--	--	--	60	--	--	--
	59	--	--		59				59	--	--
	58	--	--	--	58	--	--	--	58	--	--
	57	--	--	13.75	57	--	--		57	--	--
	56	13.51	15.52	13.76	56	14.31	14.82	14.17	56	14.09	15.62	15
	55	--	--	--	55	--	--	--	55	--	--	--
	54	--	--		54				54	--	--
	53	--	--		53				53	--	--
	52	--	--		52				52	--	--
	51	13.45	--	--	51		--	--	51		--	--
	50	--	15.31	13.87	50	14.24	14.93	14.31	50	14.02	15.62	15.05
	49	--	--		49	--	--		49	--	--
	48	--	--		48	--	--		48	--	--
	47	--	--	--	47	--	--	--	47	--	--	--
	46	13.32	15.13	13.99	46	14.02	15.01	14.29	46	14	15.3	15.06
	45	--	--		45	--	--		45	--	--
	44	--		--	44	--		--	44	--		--
	43	--	--		43				43	--	--	--
	42	--	--		42				42	--	--
	41	13.28	14.99	14.11	41	13.88	15.03	14.59	41	13.97	15.29	15.05
	40	--	--		40				40	--	--
	39	--			39				39	--
	38	--			38				38	--
	37	--		--	37	--		--	37	--		--
	36	13.24	14.96	14.26	36	13.64	14.99	14.86	36	13.96	15.19	14.76
	35	--		--	35	--		--	35	--		--
	34	--			34	--			34	--
	33	--			33	--			33	--
	32	--			32	--			32	--
	31	13.2	14.85	14.43	31	13.45	14.95	14.98	31	13.65	15.05	14.93
	30	--			30				30	--
	29	--			29				29	--
	28	--			28				28	--
	27	--			27				27	--
	26	13.15	14.69	14.49	26	13.25	14.79	15.01	26	13.56	14.67	14.78
	25	--			25	--			25	--
	24	--			24	--			24	--
	23	--			23	--			23	--
	22	--			22	--			22	--
	21	12.89	14.47	14.53	21	12.99	14.67	15.06	21	13.04	14.48	14.53
	20	--			20	--			20	--
	19	--			19	--			19	--
	18	--			18	--			18	--
	17	--			17	--			17	--
	16	12.65	14.18	14.57	16	12.89	14.58	15.075	16	12.98	13.79	14.77
	15	--			15				15	--
	14	--			14	--			14	--
	13	--			13				13	--
	12	--			12				12	--
	11	12.46	13.55	14.61	11	12.76	14.08	14.98	11	12.57	11.78	12.52
	10	--			10	--			10	--		--
	9	--			9	--			9	--		--
	8	--			8	--			8	--		--
	7	--	--		7	--			7	--	--	--
	6	11.84	12.13	14.61	6	11.35	13.64	13.46	6	11.34	--	11.38
	5	--			5				5	--	10.98	--
	4	--			4				4	--		--
	3	--			3				3	--		--
	2	--			2				2	--		--
	1	11.56	10.67	11.2	1	10.45	12.14	10.56	1	10.23	9.94	10.21
								--				--
								--				--
								--				--
