# Supplementary material for: Ultrasound-activated decafluoropentane-cored and chitosan-shelled nanodroplets for oxygen delivery to hypoxic cutaneous tissues
Source: Royal Society of Chemistry journal article supplement (doi:10.1039/c4ra03524k), 2014-01-01
Supplement: c4ra03524k2.pdf [file c4ra03524k2.pdf]

## - Supporting information -

### Materials and Methods

#### *Generation of oxygen-derived species (ozone, singlet oxygen) after UV-C sterilization*

UV-C-sterilized OLNDs underwent further analyses to exclude ozone and singlet oxygen generation. To check ozone levels, a photometric assay was performed by using Hach Lange DR5000 UV/V spectrophotometer and LCK310 ozone cuvette test kit, according to manufacturer's instruction. The generation of singlet oxygen was monitored by electron paramagnetic resonance (EPR) spectroscopy (Miniscope 100) by employing 4-oxo-2,2,6,6-tetramethyl-4-piperidone (4-oxo-TMP) as a spin probing agent. Briefly, 100  $\mu$ l of a 50 mM solution of 4-oxo-TMP in ultrapure water were added to 900  $\mu$ l of OLND liquid (Phosphate Buffered Saline, PBS) formulation. The suspension was stirred and then irradiated with UV-C for 20 minutes. The EPR spectra were recorded on 50  $\mu$ l of the suspension withdrawn after 20 min. The experiments were repeated in the absence of illumination. A PBS solution and a suspension of titanium dioxide (Aeroxide P25, 1 mg/ml) were used as negative and positive control, respectively. All experiments were repeated at least three times.

#### *In vitro oxygen release without US*

O<sub>2</sub> release by diffusion from OLND, OLNB and OSS liquid or gel formulations was estimated by monitoring O<sub>2</sub> concentration up to 7 h through Hach Langhe LDO oxymeter, displaying an accuracy of 0.01 mg/l. The oxymeter was calibrated in air, waiting for stable temperature and humidity conditions to be reached before each measurement.

#### *In vivo measurement of oxy/deoxy-hemoglobin levels without US (photoacoustic imaging)*

The shaved hind limbs of nine anaesthetized mice were topically treated with OLND, OFND or OSS gel formulations. Before, during and after treatment, the subcutaneous levels of oxy- and deoxy-hemoglobin were monitored by photoacoustic imaging, which was performed with Vevo® LAZR system featuring a hybrid US transducer (central frequency: 21 MHz; spatial resolution: 75  $\mu$ m), according to manufacturer's instructions. Such an innovative hybrid imaging technique is based on the light absorption and the acoustic transmission properties of a tissue slice interrogated by a computed tomography photoacoustic imager.<sup>1-2</sup> This approach can quantify the density of tissue chromophores such as oxy-Hb and deoxy-Hb and measure some physiological parameters such as blood oxygen saturation and total Hb concentration.<sup>3</sup>

### Results

#### *UV-C sterilization of OLNDs does not generate oxygen-derived species (ozone, singlet oxygen).*

OLND PBS formulations were sterilized through UV-C exposure for 20 min. Thereafter, the generation of ozone and singlet oxygen were monitored by using a spectrophotometric assay and EPR spectroscopy, respectively. Any significant levels of ozone (not shown) and singlet oxygen (Figure S1) were not detected.

#### *US-untreated OLNDs effectively release high oxygen amounts in a time-sustained manner in vitro.*

*In vitro* oxygen release from OLND liquid (water) and gel (2% HEC) formulations - which did not undergo complementary US administration - was monitored up to 7 h through an oxymeter and

compared with the oxygen levels released from OLNBS and OSS. As shown in Figure S2, both OLND formulations released high oxygen amounts (~14-16 mg/L) for all the observational period. On the contrary, the oxygen levels released by OLNBS and OSS appeared to be high only at the early monitored time-points (up to 21 mg/L and 18 mg/L, respectively); over time, oxygen delivery from OLNBS and OSS rapidly decreased, eventually resulting negligible at the end of the observational period.

*US-untreated OLNDs are partially effective in releasing oxygen in vivo.*

*In vivo* oxygen release from OLND gel (2% HEC) formulations - which did not undergo complementary US administration - was monitored for 15 min through photoacoustic imaging and compared oxygen delivery from OFNDs and OSS. As shown in Figure S3, OLND-treated mice displayed an immediate increase of oxy-HB levels; however, such an increase was not sustained over time. Results obtained from OSS-treated mice were similar to those from OLND-treated mice, whereas OFNDs did not promote any significant blood oxygenation, as expected.

## Figures

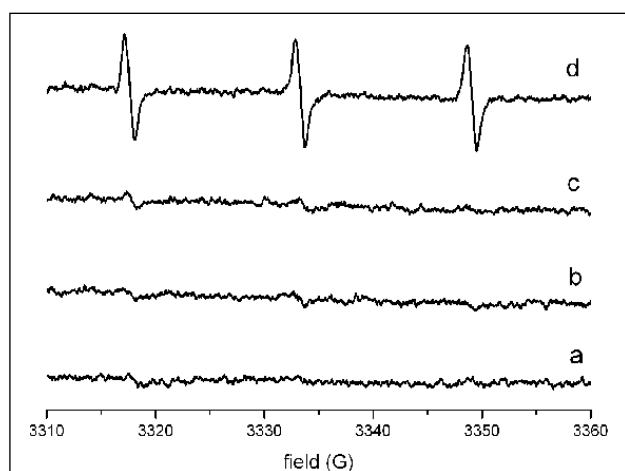

**Figure S1.** Lack of singlet oxygen generation in OLNDs after UV-C sterilization. OLND PBS formulations were sterilized through UV-C exposure for 20 min. Thereafter, the generation of singlet oxygen was monitored by EPR spectroscopy. EPR spectra were recorded on a) phosphate buffer; b) a buffered suspension of OLNDs in the dark; c) a buffered suspension of OLNDs under illumination with the UV-C lamp; d) a buffered suspension titanium dioxide (positive control). All experiments were performed in the presence of the spin probe 4-oxo-TMP. When singlet oxygen is formed a three line spectra appears. The intensity of the signal is proportional to the amount of singlet oxygen generated. Results are shown as representative images from three independent experiments.

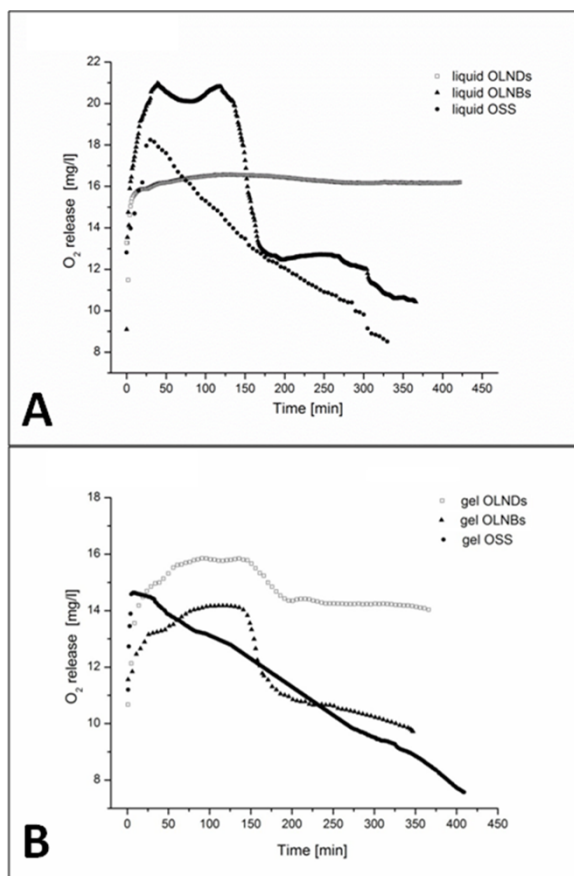

**Figure S2.** Oxygen release from OLND liquid and gel formulations in vitro. OLND, OLNBS and OSS liquid (water) and gel (2% HEC) formulations were monitored up to 7 h through an oxymeter for oxygen delivery by diffusion. Results are shown as a representative image from three independent experiments. Panel A. Release from liquid formulations. Panel B. Release from gel formulations.

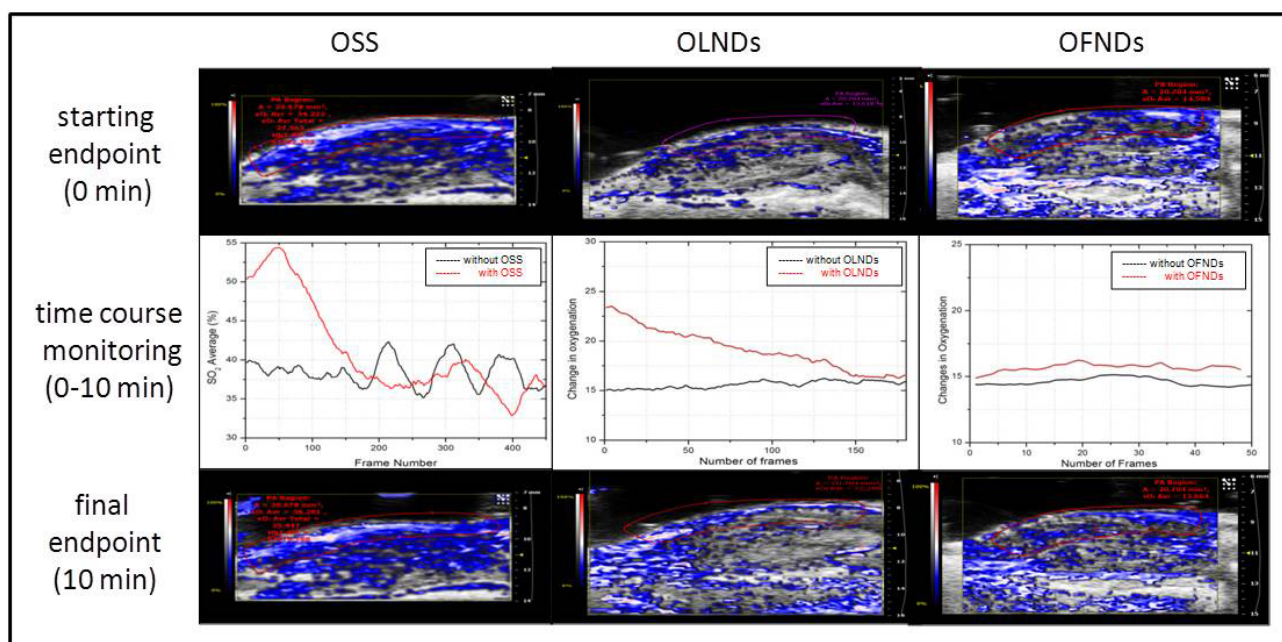

**Figure S3.** Topical treatment with OLND gel formulation partially enhances oxy-Hb levels in vivo. Shaved hind limbs of anaesthetized mice were monitored by photoacoustics for oxy-Hb and deoxy-

Hb levels before (0 min, upper row), during (0-10 min, central row) and after (10 min, lower row) topical treatment with OSS (first column), OLND (second column) and OFND (fifth column) gel formulations. White/red pixels: oxy-Hb; blue pixels: deoxy-Hb. Data are shown as representative images from three independent experiments (three mice per experiment) with similar results.

## References

- 1 J. Jose, R.G. Willemink, S. Resink, D. Piras, J.C. van Hespén, C.H. Slump, W. Steenbergen, T.G. van Leeuwen, S. Manohar, *Opt. Express*. 2011, **19**, 2093-2104. [Pubmed: 21369026]
- 2 S. Resink, J. Jose, R.G. Willemink, C.H. Slump, W. Steenbergen, T.G. van Leeuwen, S. Manohar, *Opt. Lett.* 2011, **36**, 2809-2811. [Pubmed: 21808320]
- 3 J. Laufer, D. Delpy, C. Elwell, P. Beard *Phys. Med. Biol.* **52**, 141-168. [Pubmed: 17183133]
