# Supplementary material for: Ultrasound-activated decafluoropentane-cored and chitosan-shelled nanodroplets for oxygen delivery to hypoxic cutaneous tissues
Source: Royal Society of Chemistry journal article supplement (doi:10.1039/c4ra03524k), 2014-01-01
Supplement: c4ra03524k3.pdf [file c4ra03524k3.pdf]

|    |       |       |       |     |       |       |       |    |       |       |       |
|----|-------|-------|-------|-----|-------|-------|-------|----|-------|-------|-------|
| 80 | 16.4  | 20.08 | 16.13 | 343 | 15.45 | 20.09 | 16.6  | 80 | 16.00 | 20.08 | 17.02 |
| 79 | 16.4  | 20.09 | --    | 344 | 15.45 | 20.08 |       | 79 | 16.01 | 20.1  | --    |
| 78 | 16.39 | 20.09 | --    | 345 | 15.45 | 20.1  |       | 78 | 16.01 | 20.12 | --    |
| 77 | 16.38 | 20.08 | --    | 346 | 15.44 | 20.11 |       | 77 | 16.01 | 20.14 | --    |
| 76 | 16.37 | 20.1  | --    | 347 | 15.44 | 20.09 |       | 76 | 16.02 | 20.16 | --    |
| 75 | 16.37 | 20.11 | 16.28 | 348 | 15.44 | 20.11 | 16.75 | 75 | 16.02 | 20.18 | 17.32 |
| 74 | 16.37 | 20.09 | --    | 349 | 15.44 | 20.11 |       | 74 | 16.01 | 20.2  | --    |
| 73 | 16.35 | 20.11 | --    | 350 | 15.44 | 20.11 |       | 73 | 16.01 | 20.22 | --    |
| 72 | 16.35 | 20.11 | --    | 351 | 15.45 | 20.1  |       | 72 | 16.01 | 20.24 | --    |
| 71 | 16.33 | 20.11 | --    | 352 | 15.45 | 20.1  |       | 71 | 16.01 | 20.26 | --    |
| 70 | 16.32 | 20.13 | 16.48 | 353 | 15.45 | 20.09 | 16.94 | 70 | 16.01 | 20.28 | 17.43 |
| 69 | 16.34 | 20.14 | --    | 354 | 15.45 | 20.07 |       | 69 | 16.01 | 20.3  | --    |
| 68 | 16.32 | 20.14 | --    | 355 | 15.44 | 20.05 |       | 68 | 16.01 | 20.32 | --    |
| 67 | 16.3  | 20.15 | --    | 356 | 15.44 | 20.04 |       | 67 | 16.01 | 20.34 | --    |
| 66 | 16.31 | 20.18 | --    | 357 | 15.44 | 20.00 |       | 66 | 16.00 | 20.36 | --    |
| 65 | 16.29 | 20.2  | 16.7  | 358 | 15.44 | 19.97 | 17.17 | 65 | 16.00 | 20.38 | 17.56 |
| 64 | 16.29 | 20.22 | --    | 359 | 15.44 | 19.97 |       | 64 | 16.00 | 20.4  | --    |
| 63 | 16.28 | 20.24 | --    | 360 | 15.43 | 19.96 |       | 63 | 16.00 | 20.44 | --    |
| 62 | 16.28 | 20.26 | --    | 361 | 15.43 | 19.95 |       | 62 | 16.00 | 20.46 | --    |
| 61 | 16.26 | 20.29 | --    | 362 | 15.43 | 19.9  |       | 61 | 15.99 | 20.48 | --    |
| 60 | 16.25 | 20.31 | 16.97 | 363 | 15.42 | 19.85 | 17.57 | 60 | 15.99 | 20.5  | 17.86 |
| 59 | 16.25 | 20.32 | --    | 364 | 15.42 | 19.81 |       | 59 | 15.98 | 20.52 | --    |
| 58 | 16.23 | 20.35 | --    | 365 | 15.42 | 19.78 |       | 58 | 15.96 | 20.52 | --    |
| 57 | 16.23 | 20.38 | --    | 366 | 15.42 | 19.72 |       | 57 | 15.96 | 20.53 | --    |
| 56 | 16.22 | 20.41 | --    | 367 | 15.42 | 19.65 |       | 56 | 15.96 | 20.78 | --    |
| 55 | 16.21 | 20.43 | 17.32 | 368 | 15.42 | 19.63 | 17.79 | 55 | 15.98 | 20.78 | 17.9  |
| 54 | 16.2  | 20.48 | --    | 369 | 15.43 | 19.58 |       | 54 | 15.98 | 20.8  | --    |
| 53 | 16.19 | 20.48 | --    | 370 | 15.43 | 19.49 |       | 53 | 15.98 | 20.8  | --    |
| 52 | 16.19 | 20.51 | --    | 371 | 15.43 | 19.43 |       | 52 | 15.98 | 20.8  | --    |
| 51 | 16.19 | 20.54 | --    | 372 | 15.43 | 19.41 | 17.99 | 51 | 15.97 | 20.83 | 18    |
| 50 | 16.18 | 20.56 | 17.6  | 373 | 15.44 | 19.4  |       | 50 | 15.97 | 20.83 | --    |
| 49 | 16.18 | 20.6  | --    | 374 | 15.44 | 19.36 |       | 49 | 15.97 | 20.83 | --    |
| 48 | 16.17 | 20.66 | --    | 375 | 15.44 | 19.34 |       | 48 | 15.98 | 20.85 | --    |
| 47 | 16.18 | 20.69 | --    | 376 | 15.43 | 19.33 |       | 47 | 15.98 | 20.85 | --    |
| 46 | 16.16 | 20.72 | --    | 377 | 15.43 | 19.32 |       | 46 | 15.98 | 20.86 | --    |
| 45 | 16.15 | 20.75 | 17.75 | 378 | 15.43 | 19.31 | 18.03 | 45 | 15.97 | 20.87 | 18.19 |
| 44 | 16.16 | 20.77 | --    | 379 | 15.42 | 19.24 |       | 44 | 15.97 | 20.88 | --    |
| 43 | 16.16 | 20.81 | --    | 380 | 15.42 | 19.23 |       | 43 | 15.95 | 20.87 | --    |
| 42 | 16.13 | 20.87 | --    | 381 | 15.42 | 19.2  |       | 42 | 15.95 | 20.85 | --    |
| 41 | 16.14 | 20.92 | --    | 382 | 15.41 | 19.21 |       | 41 | 15.94 | 20.67 | --    |
| 40 | 16.13 | 20.9  | 17.91 | 383 | 15.41 | 19.22 | 18.07 | 40 | 15.94 | 20.49 | 18.06 |
| 39 | 16.11 | 20.99 | --    | 384 | 15.41 | 19.3  |       | 39 | 15.93 | 20.31 | --    |
| 38 | 16.09 | 20.91 | --    | 385 | 15.41 | 19.3  |       | 38 | 15.93 | 20.09 | --    |
| 37 | 16.08 | 20.86 | --    | 386 | 15.42 | 19.35 |       | 37 | 15.92 | 20.02 | --    |
| 36 | 16.07 | 20.81 | --    | 387 | 15.42 | 19.32 |       | 36 | 15.92 | 19.73 | --    |
| 35 | 16.05 | 20.79 | 18.15 | 388 | 15.42 | 19.13 | 18.1  | 35 | 15.91 | 19.23 | 17.98 |
| 34 | 16.03 | 20.74 | --    | 389 | 15.41 | 19.00 |       | 34 | 15.90 | 19.03 | --    |
| 33 | 16.01 | 20.69 | --    | 390 | 15.41 | 18.96 |       | 33 | 15.90 | 18.98 | --    |
| 32 | 15.99 | 20.65 | --    | 391 | 15.41 | 18.56 |       | 32 | 15.89 | 18.46 | --    |
| 31 | 15.98 | 20.56 | --    | 392 | 15.41 | 18.21 |       | 31 | 15.89 | 18.35 | --    |
| 30 | 15.95 | 20.25 | 18.24 | 393 | 15.4  | 17.59 | 18.09 | 30 | 15.88 | 18.02 | 17.65 |
| 29 | 15.93 | 20.14 | --    | 394 | 15.4  | 17.54 |       | 29 | 15.88 | 17.98 | --    |
| 28 | 15.92 | 20.05 | --    | 395 | 15.4  | 17.35 |       | 28 | 15.87 | 17.74 | --    |
| 27 | 15.88 | 20.01 | --    | 396 | 15.39 | 17.22 |       | 27 | 15.87 | 17.62 | --    |
| 26 | 15.89 | 19.99 | --    | 397 | 15.39 | 17.18 |       | 26 | 15.86 | 17.54 | --    |
| 25 | 15.88 | 19.87 | 17.96 | 398 | 15.39 | 17.07 | 18.08 | 25 | 15.86 | 17.21 | 17.33 |
| 24 | 15.87 | 19.72 | --    | 399 | 15.39 | 17.05 |       | 24 | 15.86 | 17.16 | --    |
| 23 | 15.87 | 19.67 | --    | 400 | 15.4  | 17.03 |       | 23 | 15.84 | 17.11 | --    |
| 22 | 15.88 | 19.51 | --    | 401 | 15.4  | 17.00 |       | 22 | 15.83 | 17.16 | --    |
| 21 | 15.87 | 19.46 | --    | 402 | 15.4  | 16.76 |       | 21 | 15.80 | 17.01 | --    |
| 20 | 15.87 | 19.35 | 16.19 | 403 | 15.4  | 16.32 | 17.54 | 20 | 15.75 | 16.89 | 17.04 |
| 19 | 15.86 | 19.25 | --    | 404 | 15.41 | 16.17 |       | 19 | 15.71 | 16.96 | --    |
| 18 | 15.86 | 19.2  | --    | 405 | 15.41 | 16.15 |       | 18 | 15.68 | 16.52 | --    |
| 17 | 15.83 | 19.14 | --    | 406 | 15.41 | 16.1  |       | 17 | 15.62 | 16.51 | --    |
| 16 | 15.81 | 18.89 | --    | 407 | 15.41 | 15.98 |       | 16 | 15.60 | 16.12 | --    |
| 15 | 15.79 | 18.54 | 15.8  | 408 | 15.41 | 15.5  | 16.76 | 15 | 15.59 | 15.98 | 16.98 |
| 14 | 15.76 | 18.36 | --    | 409 | 15.4  | 15.22 |       | 14 | 15.55 | 15.41 | --    |
| 13 | 15.74 | 18.14 | --    | 410 | 15.4  | 15.04 |       | 13 | 15.46 | 15.26 | --    |
| 12 | 15.7  | 17.9  | --    | 411 | 15.4  | 14.98 |       | 12 | 15.38 | 15.16 | --    |
| 11 | 15.64 | 17.68 | --    | 412 | 15.4  | 14.78 |       | 11 | 15.33 | 15.12 | --    |
| 10 | 15.6  | 17.43 | 14.69 | 413 | 15.41 | 14.55 | 15.98 | 10 | 15.25 | 15.09 | 16.28 |
| 9  | 15.55 | 17.25 | --    | 414 | 15.41 | 14.01 |       | 9  | 15.19 | 14.88 | --    |
| 8  | 15.49 | 17    | --    | 415 | 15.41 | 13.57 |       | 8  | 15.16 | 14.56 | --    |
| 7  | 15.41 | 16.86 | --    | 416 | 15.42 | 13.21 |       | 7  | 15.05 | 13.41 | --    |
| 6  | 15.25 | 16.45 | --    | 417 | 15.42 | 12.7  |       | 6  | 14.98 | 12.56 | --    |
| 5  | 15.03 | 16.23 | 13.97 | 418 | 15.42 | 11.98 | 14.67 | 5  | 14.88 | 11.98 | 15.78 |
| 4  | 14.62 | 15.89 | --    | 419 | 15.41 | 11.54 |       | 4  | 14.45 | 11.46 | --    |
| 3  | 14.06 | 14.12 | --    | 420 | 15.41 | 10.78 |       | 3  | 14.23 | 10.98 | --    |
| 2  | 11.48 | 14.75 | --    | 421 | 15.41 | 10.55 |       | 2  | 13.91 | 10.32 | --    |
| 1  | 13.28 | 13.54 | --    | 422 | 15.41 | 10.43 |       | 1  | 13.76 | 10.09 | --    |
| 0  | 13.28 | 9.10  | 12.81 | 423 | 15.41 | 10.00 | 14.00 | 0  | 12.89 | 10.00 | 15.56 |
