# Supplementary figures and images for: Ultrasound-activated decafluoropentane-cored and chitosan-shelled nanodroplets for oxygen delivery to hypoxic cutaneous tissues
Source: Royal Society of Chemistry journal article supplement (doi:10.1039/c4ra03524k), 2014-01-01

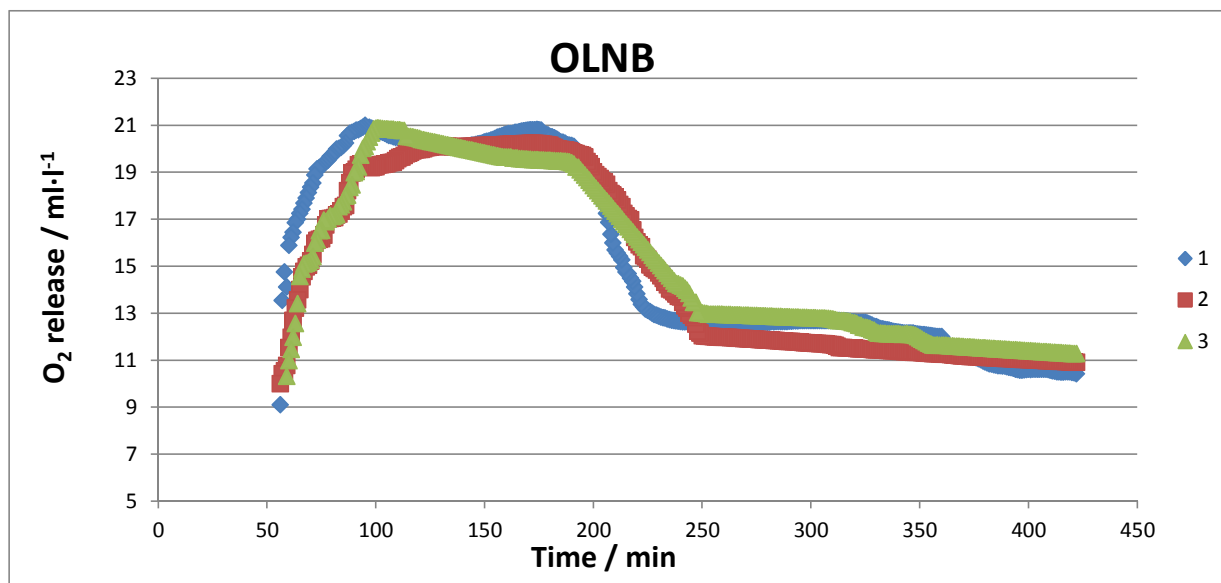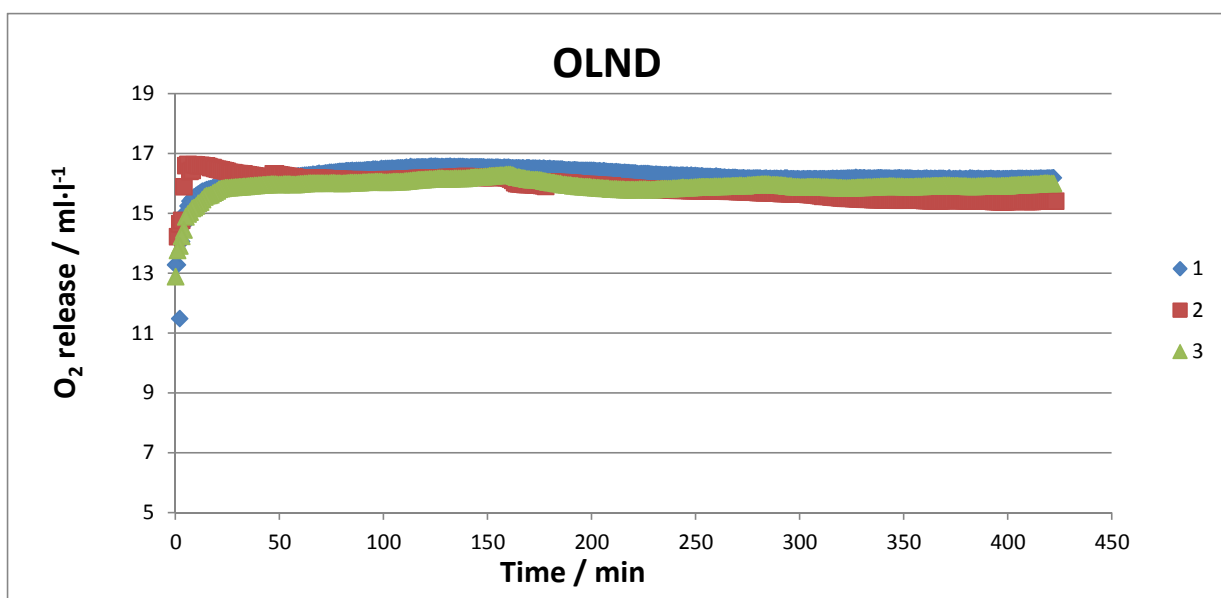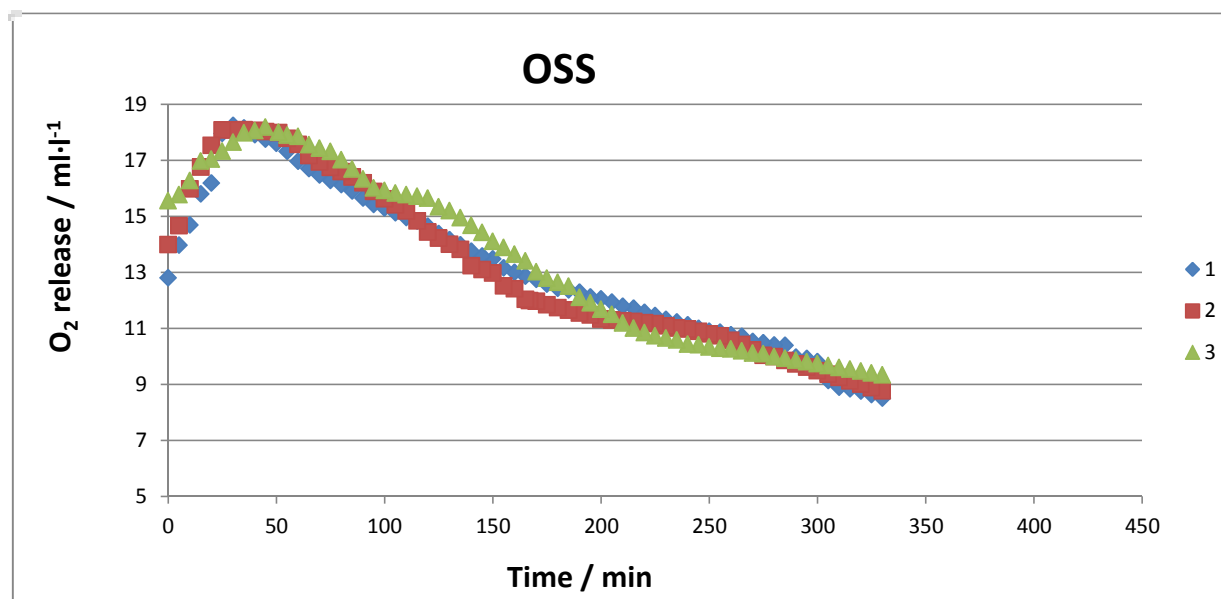

Supplement: c4ra03524k4.pdf [file c4ra03524k4.pdf]

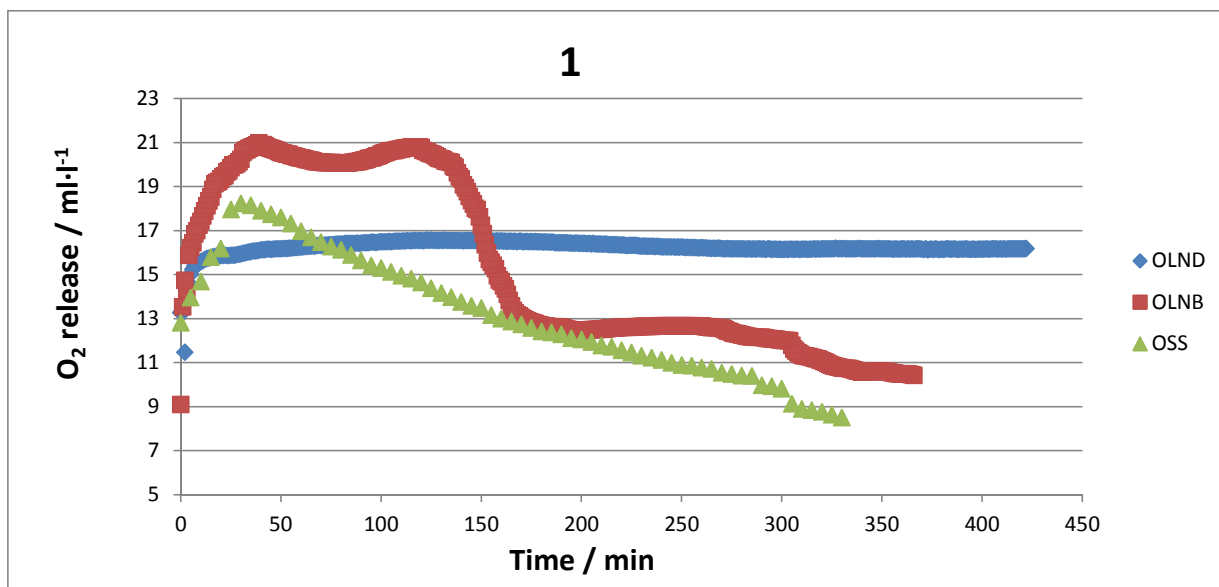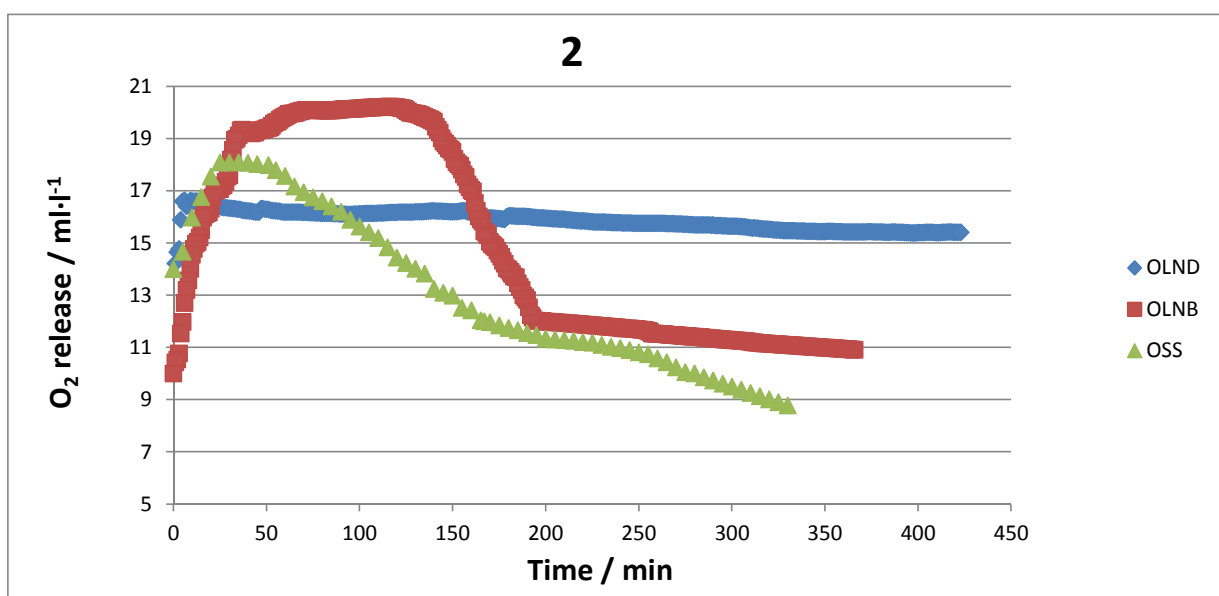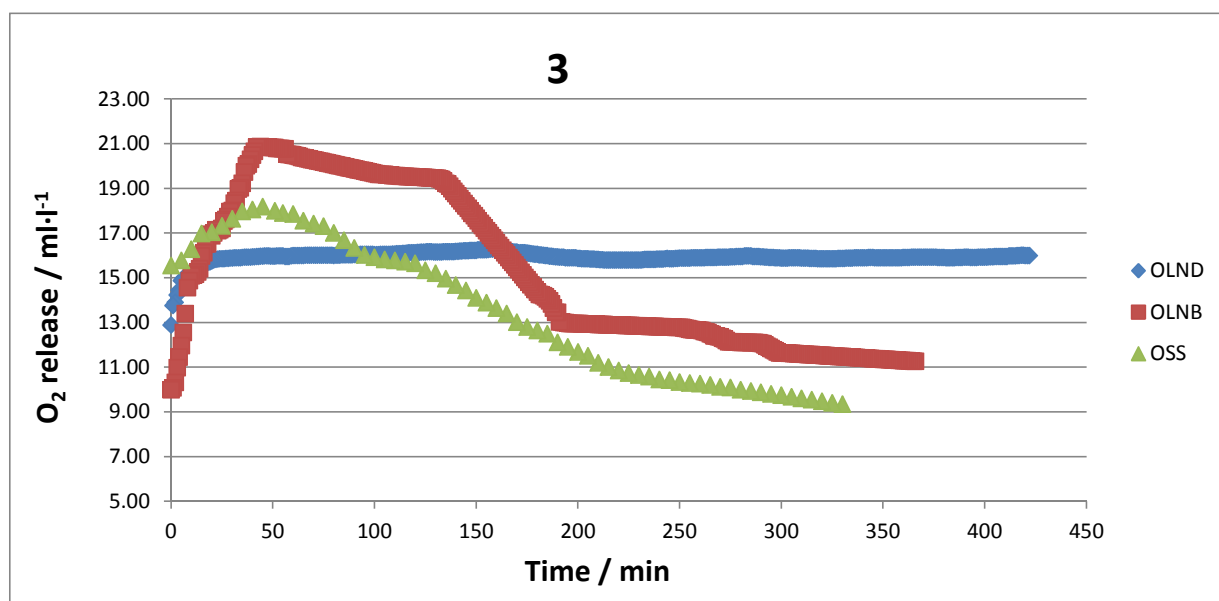

Supplement: c4ra03524k5.pdf [file c4ra03524k5.pdf]
